# Supplementary material for: From one nanobelt precursor to different ZnO nano/micro structures: porous nanobelts self-standing film and microtubes
Source: Royal Society of Chemistry journal article supplement (doi:10.1039/c3ce40779a), 2013-01-01
Supplement: c3ce40779a.pdf [file c3ce40779a.pdf]

**From one nanobelt precursor to different ZnO nano/micro structures: porous nanobelts  
self-standing film and microtubes**

Lihong Dong<sup>\*,a</sup>, Shanshan Tang<sup>b</sup>, Junyi Zhu<sup>a</sup>, Guangqing Xia<sup>a</sup>

<sup>a</sup> Department of Chemistry, Tonghua Normal University, Tonghua, 134002, China

<sup>b</sup> College of Resource and Environmental Science, Jilin Agricultural University, Changchun, 130118,  
China

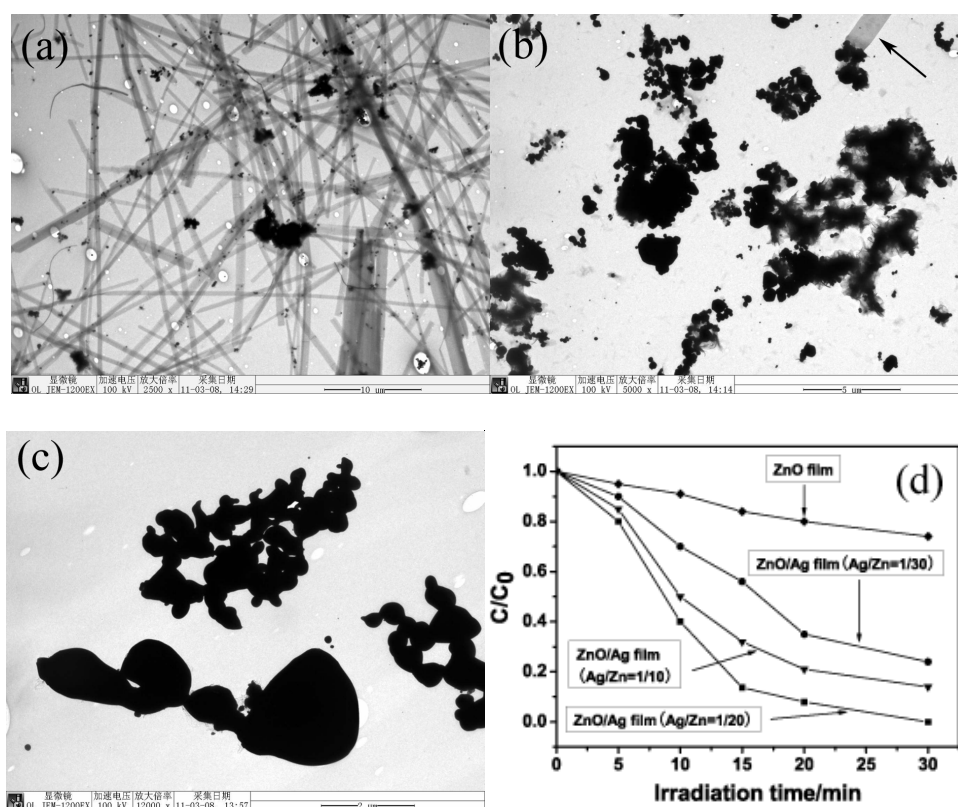

Fig. S1. TEM images of the product obtained with Ag/Zn atomic ratio of (a) 1/10, (b) 1/5, (c) 2/5. The photocatalytic activity of ZnO/Ag nanocomposite film obtained with different Ag/Zn atomic ratio.
